# Supplementary material for: Non-Pharmaceutical Interventions for Self-Regulatory Failures in Adolescents Suffering from Externalizing Symptoms: A Scoping Review
Source: MDPI journal article supplement (doi:10.3390/biomedicines9091081), 2021-08-24
Supplement: s1 [file s1]

Supplementary file 3: Non-pharmaceutical interventions for self-regulatory failures in adolescents suffering from externalizing symptoms: A scoping review

**Supplementary Table S2.** Definition of the categories

| <b>Concept</b>                | <b>Subcategories</b>                            | <b>Definition</b>                                                                                                                                                                                                                                           |
|-------------------------------|-------------------------------------------------|-------------------------------------------------------------------------------------------------------------------------------------------------------------------------------------------------------------------------------------------------------------|
| <b>Sample</b>                 | Universal prevention                            | This prevention includes school-based intervention (e.g., truancy reduction program) and targets healthy adolescents.                                                                                                                                       |
|                               | Selective prevention                            | Targets adolescents who are at risk of embarking on a criminal career (e.g., concerns adolescents with emotional or behavioral difficulties, student considered disruptive by the teacher or with academic difficulties).                                   |
|                               | Indicated prevention                            | Is subsequent to the commission of an offence and concerns youths incarcerated in a juvenile facility or under probationary period (i.e., sentence that allows adolescents offenders to remain with their family while under the supervision of the court). |
|                               | Treatment                                       | Concerns adolescents with severe externalizing disorders                                                                                                                                                                                                    |
| <b>Self-regulation</b>        | Cognition                                       | Cognitive self-regulation entails acting in accordance with values and to adopt long term goals. This category is closely related to self control skills, self management or self esteem.                                                                   |
|                               | Emotion                                         | Linked to the control of emotions, particularly to anger management and arousal (emotional state).                                                                                                                                                          |
|                               | Social                                          | Concerns the social adaptation and social competence (e.g., ability to improve family and friendship relationship).                                                                                                                                         |
|                               | Physiology                                      | Refers to capacity to regulate the bodily process during a stressful situation (e.g., survival strategies facing a challenging situation or ability to regulate heart rate).                                                                                |
| <b>Externalizing symptoms</b> | Aggressiveness                                  | Refers to hostility and inappropriate interactions with peers and adults (e.g., yelling inside of the classroom, interrupting others, truancy).                                                                                                             |
|                               | Irritability / anger                            | Linked to anger dysregulation (e.g., irritable mood, angry outburst in a specific situation).                                                                                                                                                               |
|                               | Conduct problems                                | Characterized by breaking rules and violation of social norms (e.g., disturbing disruptive behaviors).                                                                                                                                                      |
|                               | Impulsivity                                     | Refers to an impulse control disorder and to the tendency to seek highly stimulating experiences (i.e., engaging in a risky activity without considering negative consequences, with a lack of premeditation or risk taking).                               |
|                               | Offending                                       | Related to illegal and criminal activities (e.g., violent crime, violation of societal norms) and criminal conduct.                                                                                                                                         |
|                               | Attention-deficit/hyperactivity disorder (ADHD) | Refers to ADHD symptoms such as inattention, excessive physical movement, acting without thinking                                                                                                                                                           |
|                               | Substance use                                   | Refers to drugs and alcohol abuse (e.g., tobacco, alcohol, cannabis).                                                                                                                                                                                       |
|                               | Sexual risky behaviors                          | Concerns unprotected sexual activity or having more than one sexual partner, but not criminal sexual offence (i.e., sexual assault).                                                                                                                        |

Supplementary file 3: Non-pharmaceutical interventions for self-regulatory failures in adolescents suffering from externalizing symptoms: A scoping review

|                               |                                   |                                                                                                                                                                                                                                                            |
|-------------------------------|-----------------------------------|------------------------------------------------------------------------------------------------------------------------------------------------------------------------------------------------------------------------------------------------------------|
| <b>Internalizing symptoms</b> | Anxiety                           | Characterized by feelings of tension or worried thoughts (e.g., apprehension, fear).                                                                                                                                                                       |
|                               | Depressive symptoms               | Emotional state marked by negative feelings such as excessive sadness or pessimism.                                                                                                                                                                        |
|                               | Somatization                      | Refers to the expression of psychological distress as somatic symptoms (e.g., chronic pain).                                                                                                                                                               |
|                               | Self-injurious behaviors          | Refers to commission of deliberate injury to one's own body (e.g., non-suicidal self-injury behaviors).                                                                                                                                                    |
| <b>Interventions</b>          | Body-based interventions          | Describe fitness and health interventions in order to improve physical activity and well-being (e.g., yoga, massage, martial art, cardiovascular physical fitness).                                                                                        |
|                               | Emotional-based interventions     | Targeting specifically anger management therapy in order to control emotion and enhance frustration tolerance (e.g., Juvenile Justice Anger Management).                                                                                                   |
|                               | Cognitive-based interventions     | Concern approach that make use of both cognitive and behavioral tools (e.g., problem-solving training, Self-Regulated Strategy Development).                                                                                                               |
|                               | Mind-based interventions          | Aim to foster attention on what is happening in present situation, in order to improve mood, increase compassion for others and to train individuals to meditation exercises and to practice it in daily life (e.g., mindfulness, meditative martial art). |
|                               | Curriculum-based interventions    | Are multiple stepped therapy targeting several concepts, such emotion (e.g., anger control), cognition (e.g., self-management to resolve a problem) and social (e.g., friendship skills).                                                                  |
|                               | Family-based interventions        | Therapies or interventions that involve both adolescent and his parents/caregivers, in order to improve communication or cohesion within family (e.g., parent management training, program of skills building of parents and youths).                      |
|                               | Social-based interventions        | Target social skills in order to have appropriate interactions with peers and adults (e.g., conflict resolution, ability school engagement, social problem solving skills).                                                                                |
|                               | Externally mediated interventions | Concern therapies with an external media to act on disruptive behavior (e.g., music therapy, sensory room in hospital, animal assisted therapy).                                                                                                           |
