# Supplementary material for: Non-Pharmaceutical Interventions for Self-Regulatory Failures in Adolescents Suffering from Externalizing Symptoms: A Scoping Review
Source: MDPI journal article supplement (doi:10.3390/biomedicines9091081), 2021-08-24
Supplement: s1 [file s1]

**Supplementary Table S1.** Included studies (n=239)

| <b>Author, publication date</b> | <b>Location</b> | <b>Sample size (N)</b> | <b>Intervention received (N)</b> | <b>Age range</b> | <b>Intervention stages</b> | <b>Study design*</b> |
|---------------------------------|-----------------|------------------------|----------------------------------|------------------|----------------------------|----------------------|
| Alexander & Parsons (1973)      | USA             | 86                     | 46                               | 13 to 16         | Indicated                  | RCT                  |
| Apsche et al. (2005)            | USA             | 60                     | 60                               | NA               | Treatment                  | RCT                  |
| Arbuthnot & Gordon (1986)       | USA             | 48                     | 24                               | 13 to 17         | Selective                  | RCT                  |
| Aronson (1986)                  | NA              | 1                      | 1                                | 15               | Treatment                  | Single case          |
| Avci & Kelleci (2016)           | Turkey          | 60                     | 30                               | 14 to 15         | Selective                  | RCT                  |
| Bachi et al. (2012)             | USA             | 29                     | 14                               | 14 to 18         | Selective                  | Controlled-Trial     |
| Bank et al. (1991)              | USA             | 55                     | 28                               | NA               | Indicated                  | RCT                  |
| Barfield & Hutchinson (1990)    | USA             | 10                     | 10                               | 13 to 18         | Treatment                  | Open label           |
| Barnert et al. (2014)           | USA             | 29                     | 16                               | 14 to 18         | Indicated                  | Controlled-Trial     |
| Belknap et al. (2013)           | USA             | 66                     | 66                               | NA               | Universal                  | Open label           |
| Bell, et al. (1983)             | USA             | 45                     | 24                               | 10 to 16         | Treatment                  | RCT                  |
| Bögels et al. (2008)            | Netherlands     | 14                     | 14                               | 11 to 17         | Treatment                  | Open label           |
| Borduín et al. (1995)           | USA             | 176                    | 92                               | 12 to 17         | Indicated                  | RCT                  |
| Bosworth & Espelage (1998)      | USA             | 119                    | 119                              | 12 to 13         | Universal                  | Open label           |
| Brank et al. (2008)             | USA             | 314                    | 151                              | 12 to 18         | Indicated                  | RCT                  |
| Brigham et al. (1985)           | USA             | 79                     | 79                               | 11 to 14         | Selective                  | Open label           |
| Brown & Greenspan (1984)        | USA             | 32                     | 17                               | 14 to 20         | Selective                  | Controlled-Trial     |
| Burt (2018)                     | USA             | 50                     | 18                               | 11 to 14         | Selective                  | RCT                  |
| Caldwell & Jo (2012)            | USA             | 3                      | 3                                | 14 to 18         | Indicated                  | ABAB design          |
| Cancio et al. (2004)            | USA             | 6                      | 6                                | 11 to 15         | Selective                  | Open label           |
| Cardwell et al. (2019)          | Australia       | 102                    | 51                               | 10 to 16         | Selective                  | RCT                  |
| Carpenter & Sandberg (1985)     | USA             | 17                     | 7                                | 14 to 16         | Indicated                  | Controlled-Trial     |
| Carpenter & Sanderberg (1973)   | USA             | 16                     | 10                               | 15 to 16         | Indicated                  | Other                |
| Carr & Punzo (1993)             | USA             | 3                      | 3                                | 13 to 15         | Selective                  | ABAB design          |
| Carroll et al. (2012)           | Australia       | 24                     | 18                               | 12 to 18         | Indicated                  | RCT                  |
| Chao-Fernández (2020)           | Spain           | 6                      | 6                                | 16 to 18         | Selective                  | Open label           |
| Claro, Boulanger & Shaw (2015)  | Canada          | 41                     | 28                               | 12 to 17         | Selective                  | Controlled-Trial     |
| Clement (2011)                  | USA             | 1                      | 1                                | 12               | Treatment                  | Single case          |

Supplementary file 2: Non-pharmaceutical interventions for self-regulatory failures in adolescents suffering from externalizing symptoms: A scoping review

| <b>Author, publication date</b> | <b>Location</b> | <b>Sample size (N)</b> | <b>Intervention received (N)</b> | <b>Age range</b> | <b>Intervention stages</b> | <b>Study design*</b> |
|---------------------------------|-----------------|------------------------|----------------------------------|------------------|----------------------------|----------------------|
| Coleman, et al. (1992)          | USA             | 39                     | 24                               | 13 to 18         | Treatment                  | RCT                  |
| Connell et al. (2007)           | USA             | 998                    | 500                              | 11 to 17         | Universal                  | RCT                  |
| Coonerty-Femiano (2008)         | USA             | 14                     | 14                               | 13 to 14         | Selective                  | RCT                  |
| Corder et al. (1986)            | USA             | 13                     | 13                               | 13 to 18         | Treatment                  | Open label           |
| Cuenca-Sanchez et al. (2012)    | USA             | 21                     | 11                               | 12 to 15         | Selective                  | RCT                  |
| Currie (2004)                   | Australia       | 1                      | 1                                | 13               | Selective                  | Single case          |
| Currie & Startup (2012)         | Australia       | 111                    | 60                               | 12 to 15         | Selective                  | RCT                  |
| Dangel, et al. (1989)           | USA             | 18                     | NA                               | 10 to 17         | Indicated                  | ABAB design          |
| Davidson et al. (1987)          | USA             | 213                    | 124                              | NA               | Indicated                  | RCT                  |
| Davis & Hajicek (1985)          | USA             | 7                      | 7                                | 9 to 15          | Treatment                  | Other                |
| De Fuccio et al. (2009)         | USA             | 52                     | 28                               | 12 to 22         | Indicated                  | Controlled-Trial     |
| Deffenbacher et al. (1996)      | USA             | 120                    | 79                               | 11 to 14         | Selective                  | RCT                  |
| Derbyshire et al. (2019)        | UK              | 21                     | 21                               | 16 to 17         | Indicated                  | Open label           |
| Dishion & Andrews (1995)        | USA             | 158                    | 119                              | 10 to 14         | Selective                  | RCT                  |
| Dos Santos (2018)               | South Africa    | 6                      | 6                                | 15 to 18         | Selective                  | Qualitative          |
| Down et al. (2011)              | UK              | 25                     | 18                               | NA               | Treatment                  | RCT                  |
| Ducharme et al. (2012)          | USA             | 37                     | 18                               | 9 to 17          | Treatment                  | Controlled-Trial     |
| Dykeman (1995)                  | USA             | 4                      | 4                                | 13 to 14         | Treatment                  | Other                |
| Elder & Edelstein (1979)        | USA             | 4                      | 4                                | NA               | Treatment                  | ABAB design          |
| Ennis et al. (2015)             | USA             | 44                     | 44                               | 12 to 18         | Selective                  | Open label           |
| Etscheidt (1991)                | USA             | 30                     | NA                               | 12 to 18         | Selective                  | RCT                  |
| Feindler (1995)                 | USA             | 1                      | 1                                | 13               | Selective                  | Single case          |
| Feindler et al. (1986)          | USA             | 29                     | 21                               | 13 to 18         | Treatment                  | Controlled-Trial     |
| Feindler et al. (1984)          | USA             | 36                     | 18                               | 12 to 15         | Selective                  | RCT                  |
| Felver et al. (2020)            | USA             | 23                     | 9                                | NA               | Universal                  | Controlled-Trial     |
| Fishbein et al. (2006)          | USA             | 120                    | 56                               | NA               | Selective                  | RCT                  |
| Fosco et al. (2013)             | USA             | 593                    | 386                              | 11 to 14         | Universal                  | RCT                  |
| Franco et al. (2016)            | Spain           | 27                     | 13                               | 12 to 19         | Universal                  | RCT                  |

Supplementary file 2: Non-pharmaceutical interventions for self-regulatory failures in adolescents suffering from externalizing symptoms: A scoping review

| <b>Author, publication date</b>          | <b>Location</b> | <b>Sample size (N)</b> | <b>Intervention received (N)</b> | <b>Age range</b> | <b>Intervention stages</b> | <b>Study design*</b> |
|------------------------------------------|-----------------|------------------------|----------------------------------|------------------|----------------------------|----------------------|
| Fung et al. (2016)                       | USA             | 19                     | 9                                | 12 to 14         | Selective                  | RCT                  |
| Fung et al. (2019)                       | USA             | 145                    | 79                               | 13 to 15         | Selective                  | RCT                  |
| Gaines & Barry (2008)                    | USA             | 6                      | 6                                | 15 to 18         | Indicated                  | ABAB design          |
| Garaigordobil & Peña-Sarrionandia (2015) | Spain           | 148                    | 83                               | 13 to 16         | Universal                  | RCT                  |
| Garrett & Giddings (2014)                | USA             | 5                      | 5                                | NA               | Selective                  | Multiple cases       |
| Garwood et al. (2019)                    | USA             | 11                     | 11                               | 13 to 16         | Treatment                  | ABAB design          |
| Gentry & Ostapiuk (1988)                 | UK              | 1                      | 1                                | 17               | Indicated                  | Single case          |
| Glick & Goldstein (1987)                 | USA             | 60                     | 48                               | 14 to 17         | Indicated                  | RCT                  |
| Glomb & West (1990)                      | USA             | 2                      | 2                                | NA               | Selective                  | Multiple cases       |
| Goldstein et al. (2018)                  | USA             | 57                     | 29                               | 14 to 20         | Indicated                  | RCT                  |
| Gómez et al. (2014)                      | Spain           | 5                      | 5                                | 15 to 17         | Treatment                  | Other                |
| Gonzales et al. (2012)                   | USA             | 516                    | 338                              | NA               | Universal                  | RCT                  |
| Gottfredson et al. (2002)                | USA             | 188                    | 90                               | 12 to 14         | Universal                  | RCT                  |
| Gregory et al. (1997)                    | NA              | 3                      | 3                                | 13 to 14         | Selective                  | ABAB design          |
| Gross et al. (1980)                      | USA             | 10                     | 10                               | 12 to 16         | Indicated                  | Open label           |
| Guerra (1990)                            | USA             | 120                    | 80                               | 15 to 18         | Indicated                  | RCT                  |
| Hains (1984)                             | USA             | 4                      | 4                                | 14 to 17         | Indicated                  | ABAB design          |
| Hains (1989)                             | USA             | 4                      | 4                                | 15 to 17         | Indicated                  | Open label           |
| Hains & Hains (1988)                     | USA             | 5                      | 5                                | 15 to 17         | Indicated                  | ABBA crossover       |
| Hanselman (2001)                         | USA             | 7                      | 7                                | NA               | Indicated                  | ABAB design          |
| Hansen et al. (2013)                     | USA             | 3                      | 3                                | 7 to 12          | Selective                  | Multiple cases       |
| Harvey, et al (2020)                     | USA             | 19                     | 19                               | 10 to 17         | Selective                  | Open label           |
| Havighurst et al. (2015)                 | Australia       | 212                    | 113                              | 10 to 13         | Universal                  | RCT                  |
| Hawkins et al. (1991)                    | USA             | 141                    | 69                               | 11 to 18         | Indicated                  | RCT                  |
| Hay et al. (2010)                        | USA             | 671                    | 338                              | 12 to 15         | Selective                  | RCT                  |
| Heaton et al. (1976)                     | USA             | 46                     | 32                               | 13 to 14         | Selective                  | Controlled-Trial     |
| Hein et al. (2020) – Study 1             | Germany         | 476                    | 305                              | 16.03            | Indicated                  | RCT                  |
| Hein et al. (2020) – Study 2             | Germany         | 476                    | 305                              | 16.03            | Indicated                  | Open label           |
| Henggeler et al. (1992)                  | USA             | 56                     | 33                               | NA               | Indicated                  | RCT                  |

Supplementary file 2: Non-pharmaceutical interventions for self-regulatory failures in adolescents suffering from externalizing symptoms: A scoping review

| <b>Author, publication date</b> | <b>Location</b> | <b>Sample size (N)</b> | <b>Intervention received (N)</b> | <b>Age range</b> | <b>Intervention stages</b> | <b>Study design*</b> |
|---------------------------------|-----------------|------------------------|----------------------------------|------------------|----------------------------|----------------------|
| Hentges et al. (2020)           | USA             | 731                    | 367                              | NA               | Universal                  | RCT                  |
| Hilyer et al. (1982)            | USA             | 43                     | 23                               | 15 to 18         | Indicated                  | RCT                  |
| Himmelstein et al. (2011)       | USA             | 32                     | 32                               | 14 to 18         | Indicated                  | Open label           |
| Hobbs & Holt (1976)             | USA             | 125                    | NA                               | 12 to 15         | Indicated                  | Controlled-Trial     |
| Hogue et al. (2017)             | USA             | 205                    | 104                              | 12 to 18         | Treatment                  | RCT                  |
| Holmqvist et al. (2009)         | Sweden          | 57                     | 26                               | 16 to 19         | Indicated                  | Controlled-Trial     |
| Hoogsteder et al. (2018)        | Netherlands     | 91                     | 63                               | 16 to 21         | Indicated                  | Controlled-Trial     |
| Hornsveld et al. (2008)         | Netherlands     | 142                    | NA                               | 13 to 20         | Treatment                  | Open label           |
| Hornsveld et al. (2015)         | Netherlands     | 62                     | NA                               | 15 to 21         | Indicated                  | Controlled-Trial     |
| Houck et al. (2016)             | USA             | 420                    | 222                              | 12 to 14         | Selective                  | ABBA crossover       |
| Hovell et al. (2001)            | USA             | 29                     | 29                               | 13 to 18         | Indicated                  | Controlled-Trial     |
| Huey & Rank (1984)              | USA             | 48                     | 24                               | 13 to 15         | Selective                  | RCT                  |
| Huey et al. (2000)              | USA             | 114                    | 54                               | NA               | Indicated                  | RCT                  |
| Jamali et al. (2016)            | Iran            | 100                    | 50                               | NA               | Universal                  | RCT                  |
| Jones et al. (2004)             | USA             | 35                     | 24                               | 11 to 16         | Indicated                  | Controlled-Trial     |
| Kaffman (1968)                  | Israel          | 32                     | 32                               | 8 to 15          | Treatment                  | Multiple cases       |
| Kahn & McFarland (1973)         | USA             | 47                     | 47                               | NA               | Indicated                  | Open label           |
| Kanchibhotla et al. (2021)      | India           | 454                    | 237                              | 13 to 17         | Universal                  | Other                |
| Kappes & Thompson (1985)        | USA             | 26                     | 12                               | 15 to 18         | Indicated                  | RCT                  |
| Kastner (1998)                  | USA             | 11                     | 11                               | NA               | Treatment                  | Open label           |
| Kauser & Pinquart (2019)        | Pakistan        | 110                    | 50                               | NA               | Selective                  | RCT                  |
| Kaya & Buzlu (2016)             | Turkey          | 65                     | 32                               | 14 to 17         | Indicated                  | Controlled-Trial     |
| Keiley (2007)                   | USA             | 73                     | 73                               | 13 to 18         | Indicated                  | Open label           |
| Kellner & Bry (1999)            | USA             | 7                      | 7                                | 14 to 18         | Selective                  | Open label           |
| Kellner et al. (2002)           | USA             | 46                     | 27                               | 12 to 16         | Selective                  | Controlled-Trial     |
| Kellner et al. (2003)           | USA             | 46                     | 27                               | 12 to 16         | Selective                  | Controlled-Trial     |
| Kethineni & Braithwaite (2010)  | USA             | 172                    | 86                               | 11 to 18         | Indicated                  | Controlled-Trial     |
| Kifer et al. (1974)             | USA             | 3                      | 3                                | 13 to 17         | Selective                  | ABAB design          |
| Kimber et al. (2008)            | Sweden          | 1417                   | 1028                             | 7 to 16          | Universal                  | Controlled-Trial     |

Supplementary file 2: Non-pharmaceutical interventions for self-regulatory failures in adolescents suffering from externalizing symptoms: A scoping review

| <b>Author, publication date</b> | <b>Location</b> | <b>Sample size (N)</b> | <b>Intervention received (N)</b> | <b>Age range</b> | <b>Intervention stages</b> | <b>Study design*</b> |
|---------------------------------|-----------------|------------------------|----------------------------------|------------------|----------------------------|----------------------|
| Langeveld et al. (2012)         | Norway          | 112                    | 112                              | NA               | Universal                  | RCT                  |
| Larson (1992)                   | USA             | 37                     | 22                               | NA               | Selective                  | RCT                  |
| Larson et al. (1998)            | USA             | NA                     | NA                               | NA               | Treatment                  | Open label           |
| Lazarus (1993)                  | USA             | 18                     | NA                               | 11 to 13         | Selective                  | Open label           |
| Le & Proulx (2015)              | Hawaii          | 36                     | 36                               | 14 to 18         | Indicated                  | Open label           |
| Lee et al. (1979)               | Canada          | 26                     | 7                                | 14 to 15         | Selective                  | RCT                  |
| Leonard et al. (2013)           | USA             | 264                    | 147                              | 16 to 18         | Indicated                  | RCT                  |
| Leve et al. (2005)              | USA             | 81                     | 37                               | 13 to 17         | Indicated                  | RCT                  |
| Lök et al. (2018)               | Turkey          | 60                     | 30                               | NA               | Selective                  | RCT                  |
| Lombas et al. (2019)            | Spain           | 524                    | 156                              | 12 to 17         | Universal                  | Controlled-Trial     |
| Long & Sherer (1984)            | USA             | 27                     | 9                                | 12 to 17         | Indicated                  | Controlled-Trial     |
| Lutz (2014)                     | USA             | NA                     | NA                               | NA               | Treatment                  | Single case          |
| MacMahon & Gross (1988)         | USA             | 69                     | 32                               | 14 to 18         | Indicated                  | RCT                  |
| Marco et al. (2013)             | NA              | 2                      | 2                                | 12 to 18         | Treatment                  | Multiple cases       |
| Marshall & Heward (1979)        | NA              | 8                      | 8                                | 16 to 17         | Indicated                  | Open label           |
| Martin & Johnson (2005)         | USA             | 7                      | 7                                | 14 to 17         | Indicated                  | Open label           |
| Martsch (2005)                  | USA             | 65                     | 34                               | 13 to 18         | Indicated                  | RCT                  |
| Marvit et al. (1974)            | Hawaii          | 44                     | 23                               | NA               | Indicated                  | RCT                  |
| Mason et al. (2010)             | USA             | 5                      | 5                                | 12 to 14         | Selective                  | Open label           |
| Mason et al. (2016)             | USA             | 321                    | 118                              | NA               | Universal                  | Other                |
| Mathur & Rutherford (1994)      | USA             | 9                      | 9                                | 13 to 17         | Indicated                  | ABAB design          |
| Maya et al. (2019)              | Spain           | 216                    | 109                              | 11 to 17         | Selective                  | Controlled-Trial     |
| Mazerolle et al. (2017)         | Australia       | 102                    | 51                               | 10 to 16         | Selective                  | RCT                  |
| Mazerolle et al. (2017)         | Australia       | 102                    | 51                               | 10 to 16         | Selective                  | RCT                  |
| Mazerolle et al. (2019)         | Australia       | 102                    | 51                               | 10 to 16         | Indicated                  | RCT                  |
| Mazerolle et al. (2020)         | Australia       | 102                    | 51                               | NA               | Universal                  | RCT                  |
| McAllister et al. (1969)        | USA             | 51                     | 25                               | 16 to 19         | Universal                  | Controlled-Trial     |
| McCarthy-Tucker et al. (1999)   | USA             | 8                      | 8                                | NA               | Indicated                  | Open label           |
| McCraty et al. (1999)           | USA             | 92                     | 62                               | 12 to 14         | Selective                  | RCT                  |

Supplementary file 2: Non-pharmaceutical interventions for self-regulatory failures in adolescents suffering from externalizing symptoms: A scoping review

| <b>Author, publication date</b> | <b>Location</b> | <b>Sample size (N)</b> | <b>Intervention received (N)</b> | <b>Age range</b> | <b>Intervention stages</b> | <b>Study design*</b> |
|---------------------------------|-----------------|------------------------|----------------------------------|------------------|----------------------------|----------------------|
| McCullough et al. (1977)        | USA             | 1                      | 1                                | 16               | Treatment                  | Single case          |
| McMahon & Washbur (2003)        | USA             | 149                    | 149                              | 11 to 14         | Selective                  | Open label           |
| McNamara & Heard (1976)         | UK              | 20                     | 20                               | 13 to 14         | Universal                  | RCT                  |
| McNamara & Jolly (1990)         | UK              | 15                     | NA                               | 12 to 13         | Universal                  | Open label           |
| McWirther & Page (1999)         | USA             | 57                     | 19                               | 16 to 19         | Selective                  | Controlled-Trial     |
| Minkos et al. (2018)            | USA             | 2                      | 2                                | 15 to 16         | Selective                  | Open label           |
| Minor & Elrod (1994)            | USA             | 45                     | 22                               | 12 to 17         | Indicated                  | RCT                  |
| Mohammadi et al. (2017)         | Iran            | 8                      | 8                                | 14 to 18         | Indicated                  | Open label           |
| Moneta & Rousseau (2008)        | Canada          | 20                     | 20                               | 13 to 16         | Selective                  | Qualitative          |
| Moretti & Obsuth (2009)         | Canada          | 329                    | NA                               | NA               | Treatment                  | Controlled-Trial     |
| Mutiso et al. (2018)            | Kenya           | 630                    | 171                              | 11 to 18         | Selective                  | RCT                  |
| Neel & De Bruler (1979)         | USA             | 73                     | 55                               | 12 to 15         | Selective                  | Open label           |
| Nelson Gray et al. (2006)       | USA             | 32                     | 32                               | 10 to 15         | Treatment                  | Open label           |
| Nickel et al. (2005)            | NA              | 87                     | 44                               | 16 to 18         | Selective                  | RCT                  |
| Niles (1986)                    | USA             | 59                     | 19                               | 13 to 15         | Indicated                  | RCT                  |
| Ninness et al. (1995)           | USA             | 4                      | 4                                | 14 to 15         | Selective                  | ABAB design          |
| Nugent et al. (1999)            | USA             | 522                    | NA                               | 11 to 17         | Indicated                  | Open label           |
| Nugent et al. (1997)            | USA             | 102                    | 9                                | 12 to 18         | Indicated                  | Controlled-Trial     |
| Ollendick & Hersen (1979)       | USA             | 27                     | NA                               | 13 to 16         | Indicated                  | RCT                  |
| Oruche et al. (2018)            | USA             | 20                     | 11                               | 12 to 18         | Treatment                  | RCT                  |
| Panosky & Shelton (2015)        | USA             | 6                      | 6                                | 16 to 17         | Indicated                  | ABAB design          |
| Pardo et al. (2020)             | Spain           | 20                     | NA                               | 14 to 17         | Treatment                  | Qualitative          |
| Patrick & Rich (2004)           | NA              | 8                      | 8                                | NA               | Indicated                  | Single case          |
| Patterson (1974)                | USA             | 41                     | 41                               | NA               | Selective                  | Open label           |
| Pazaratz (1998)                 | Canada          | 1                      | 1                                | 15               | Treatment                  | Single case          |
| Peterson et al. (1999)          | USA             | 29                     | 29                               | 12 to 14         | Selective                  | Open label           |
| Phillips et al. (1971)          | USA             | 6                      | 6                                | 12 to 15         | Indicated                  | ABAB design          |
| Pop-Jordanova (2009)            | Macedonia       | 74                     | 59                               | NA               | Treatment                  | Controlled-Trial     |
| Presley & Hughes (2000)         | USA             | 4                      | 4                                | 14 to 17         | Selective                  | Open label           |

Supplementary file 2: Non-pharmaceutical interventions for self-regulatory failures in adolescents suffering from externalizing symptoms: A scoping review

| <b>Author, publication date</b> | <b>Location</b> | <b>Sample size (N)</b> | <b>Intervention received (N)</b> | <b>Age range</b> | <b>Intervention stages</b> | <b>Study design*</b> |
|---------------------------------|-----------------|------------------------|----------------------------------|------------------|----------------------------|----------------------|
| Puskar et al. (2015)            | USA             | 179                    | 93                               | 14 to 18         | Universal                  | RCT                  |
| Quinn & Van Dyke (2004)         | USA             | 362                    | 267                              | NA               | Indicated                  | Controlled-Trial     |
| Ramadoss & Bose (2010)          | USA             | 70                     | 70                               | 16 to 17         | Indicated                  | Open label           |
| Rapp-Paglicci et al. (2011)     | USA             | 108                    | 108                              | 15 to 18         | Indicated                  | Open label           |
| Redondo et al. (2012)           | Spain           | 28                     | 17                               | 15 to 20         | Indicated                  | Controlled-Trial     |
| Rowlands et al. (2020)          | USA             | 14                     | 14                               | 13 to 17         | Indicated                  | Open label           |
| Richman & Harper (1979)         | USA             | 54                     | 54                               | NA               | Indicated                  | Open label           |
| Rickson & Watkins (2003)        | New Zealand     | 15                     | 11                               | 11 to 15         | Treatment                  | RCT                  |
| Rizzo et al. (2020)             | USA             | 119                    | 59                               | NA               | Universal                  | RCT                  |
| Robinson, et al. (2002)         | USA             | 41                     | 22                               | 11 to 15         | Selective                  | RCT                  |
| Rodríguez et al. (2016)         | Costa Rica      | 28                     | 28                               | NA               | Selective                  | Qualitative          |
| Rogevich & Perin (2008)         | USA             | 63                     | 30                               | 13 to 16         | Treatment                  | Controlled-Trial     |
| Rohde et al. (2004)             | USA             | 138                    | 46                               | 12 to 25         | Indicated                  | RCT                  |
| Ronen (2004)                    | Israel          | 1                      | 1                                | 12               | Treatment                  | Single case          |
| Ronen & Rosenbaum (2009)        | Israel          | 447                    | 167                              | 14 to 15         | Selective                  | Controlled-Trial     |
| Rosenberg (2004)                | USA             | 1347                   | 1084                             | 13 to 14         | Universal                  | Controlled-Trial     |
| Ruttledge & Petrides (2011)     | Ireland         | 22                     | 22                               | 13 to 14         | Selective                  | Open label           |
| Santogrossi et al. (1973)       | USA             | 9                      | 9                                | 12 to 15         | Treatment                  | ABAB design          |
| Sanz de Acedo & Iriarte (2001)  | Spain           | 109                    | 50                               | 14 to 16         | Selective                  | RCT                  |
| Scherer et al. (1994)           | USA             | 55                     | 23                               | 11 to 17         | Indicated                  | RCT                  |
| Schippers et al. (2020)         | Netherlands     | 25                     | 11                               | 13 to 23         | Treatment                  | RCT                  |
| Schlichter & Horan (1981)       | USA             | 38                     | 10                               | 13 to 18         | Indicated                  | RCT                  |
| Schloss et al. (1983)           | USA             | 1                      | 1                                | 18               | Treatment                  | Single case          |
| Schuurmans et al. (2018)        | Netherlands     | 37                     | 18                               | NA               | Treatment                  | RCT                  |
| Seckman et al. (2016)           | USA             | NA                     | NA                               | 12 to 17         | Treatment                  | Open label           |
| Seivert et al. (2018)           | USA             | 138                    | 83                               | 13 to 18         | Indicated                  | RCT                  |
| Shahbazi et al. (2017)          | IRAN            | 30                     | 15                               | 15 to 18         | Selective                  | RCT                  |
| Sharry & Owens (2000)           | UK              | 6                      | 6                                | 13 to 16         | Selective                  | Multiple cases       |
| Shivrattan (1988)               | Canada          | 43                     | 14                               | 15 to 17         | Indicated                  | RCT                  |

Supplementary file 2: Non-pharmaceutical interventions for self-regulatory failures in adolescents suffering from externalizing symptoms: A scoping review

| <b>Author, publication date</b>  | <b>Location</b> | <b>Sample size (N)</b> | <b>Intervention received (N)</b> | <b>Age range</b> | <b>Intervention stages</b> | <b>Study design*</b> |
|----------------------------------|-----------------|------------------------|----------------------------------|------------------|----------------------------|----------------------|
| Singh et al. (2007)              | USA             | 3                      | 3                                | 13 to 14         | Treatment                  | Open label           |
| Smaller (2012)                   | USA             | 15                     | 2                                | NA               | Selective                  | Multiple cases       |
| Smith et al. (2017)              | USA             | 152                    | 83                               | 11 to 15         | Selective                  | RCT                  |
| Smith et al. (1998)              | USA             | 4                      | 4                                | 13 to 15         | Selective                  | ABAB design          |
| Snyder & Shapiro (1997)          | USA             | 3                      | 3                                | 14 to 15         | Selective                  | Open label           |
| Snyder & White (1979)            | USA             | 15                     | 5                                | 14 to 17         | Indicated                  | RCT                  |
| Snyder et al. (1999)             | USA             | 50                     | 25                               | NA               | Treatment                  | RCT                  |
| Sosa-Rubi et al. (2017)          | Mexico          | 885                    | 381                              | NA               | Universal                  | Controlled-Trial     |
| Spence & Marzillier (1981)       | UK              | 76                     | 32                               | 10 to 16         | Indicated                  | RCT                  |
| Stormshak et al. (2005)          | USA             | 584                    | 584                              | NA               | Universal                  | Open label           |
| Sutton et al. (2013)             | New Zealand     | 20                     | 20                               | NA               | Treatment                  | Qualitative          |
| Syzmanski et al. (2018)          | USA             | 73                     | 43                               | NA               | Indicated                  | RCT                  |
| Teeter et al. (2000)             | USA             | 17                     | 8                                | NA               | Selective                  | RCT                  |
| Thoder & Cautilli (2011)         | USA             | 39                     | 39                               | 14 to 17         | Indicated                  | Open label           |
| Titilayo & Aderanti (2012)       | Nigeria         | 72                     | 36                               | 9 to 16          | Indicated                  | Controlled-Trial     |
| Trajkovic et al. (2020)          | Italy           | 107                    | 56                               | NA               | Universal                  | RCT                  |
| Trulson (1986)                   | USA             | 34                     | 15                               | 13 to 17         | Indicated                  | Controlled-Trial     |
| Trupin et al. (2011)             | USA             | 274                    | 105                              | 12 to 19         | Indicated                  | Controlled-Trial     |
| Twemlow & Sacco (1998)           | USA             | 3                      | 3                                | 10 to 16         | Indicated                  | Multiple cases       |
| Tyson (2002)                     | USA             | 11                     | 5                                | NA               | Indicated                  | RCT                  |
| Umbach et al. (2018)             | USA             | 197                    | 109                              | 16 to 18         | Indicated                  | RCT                  |
| Uzunoglu & Baysan-Arabaci (2017) | Turkey          | 16                     | 8                                | 12 to 18         | Treatment                  | Controlled-Trial     |
| Valliant et al. (1995)           | Canada          | 39                     | 29                               | 16 to 18         | Indicated                  | Controlled-Trial     |
| Van Bockstaele et al. (2020)     | Netherlands     | 39                     | 19                               | 12 to 16         | Selective                  | RCT                  |
| Van Manen et al. (2004)          | Netherlands     | 97                     | 42                               | 9 to 13          | Treatment                  | RCT                  |
| Van Vliet et al. (2017)          | Canada          | 28                     | 28                               | 12 to 17         | Treatment                  | RCT                  |
| Van Wijk-Herbrink et al. (2017)  | Netherlands     | 4                      | 4                                | 15 to 17         | Treatment                  | Multiple cases       |
| Wainryb et al. (2018)            | USA             | 241                    | 114                              | 8 to 17          | Universal                  | RCT                  |
| West et al. (2017)               | Australia       | 112                    | 56                               | 12 to 18         | Treatment                  | Open label           |



Supplementary file 2: Non-pharmaceutical interventions for self-regulatory failures in adolescents suffering from externalizing symptoms: A scoping review

| <b>Author, publication date</b> | <b>Location</b> | <b>Sample size (N)</b> | <b>Intervention received (N)</b> | <b>Age range</b> | <b>Intervention stages</b> | <b>Study design*</b> |
|---------------------------------|-----------------|------------------------|----------------------------------|------------------|----------------------------|----------------------|
| Whitfield (1999)                | USA             | 28                     | 8                                | NA               | Selective                  | Controlled-Trial     |
| Williams & Akamatsu (1978)      | USA             | 30                     | NA                               | NA               | Indicated                  | RCT                  |
| Wodarski et al. (1979)          | USA             | 40                     | 21                               | NA               | Indicated                  | RCT                  |
| Wolff & Ollendick (2012)        | USA             | 5                      | 5                                | 11 to 14         | Treatment                  | ABAB design          |
| Wongtongkam et al. (2014)       | Thailand        | 96                     | 40                               | NA               | Universal                  | Controlled-Trial     |
| Yektatalab et al. (2017)        | Iran            | 140                    | 70                               | 13 to 15         | Universal                  | RCT                  |
| Zapolski & Smith (2017)         | USA             | 53                     | 53                               | 12 to 14         | Selective                  | Open label           |
| Zhou et al. (2018)              | Singapore       | 156                    | NA                               | NA               | Indicated                  | Open label           |
| Zivin et al. (2001)             | USA             | 60                     | 32                               | 11 to 14         | Selective                  | ABBA crossover       |

\*Study design: RCT = Randomized controlled trial

## References

1. Alexander, J.F.; Parsons, B.V. Short-term behavioral intervention with delinquent families: impact on family process and recidivism. *Journal of Abnormal Psychology* **1973**, *81*, 219-225, doi:10.1037/h0034537.
2. Apsche, J.A.; Bass, C.K.; Siv, A.M.; Matteson, S.C. An Empirical "Real World" Comparison of Two Treatments wit Aggressive Adolescent Males. *International Journal of Behavioral and Consultation Therapy* **2005**, *1*, 239-251, doi:10.1037/h0100748.
3. Arbuthnot, J.; Gordon, D.A. Behavioral and cognitive effects of a moral reasoning development intervention for high-risk behavior-disordered adolescents. *Journal of Consult Clinical Psychology* **1986**, *54*, 208-216, doi:10.1037//0022-006x.54.2.208.
4. Aronson, D.M. The adolescent as hypnotist: Hypnosis and self-hypnosis with adolescent psychiatric inpatients. *American Journal of Clinical Hypnosis* **1986**, *28*, 163-169.
5. Avci, D.; Kelleci, M. Effects of the Anger Coping Programme based on cognitive behavioural techniques on adolescents' anger, aggression and psychological symptoms. *International Journal of Nursing Practice* **2016**, *22*, 189-196.
6. Bachi, K.; Terkel, J.; Teichman, M. Equine-facilitated psychotherapy for at-risk adolescents: the influence on self-image, self-control and trust. *Clinical Child Psychology and Psychiatry* **2012**, *17*, 298-312, doi:10.1177/1359104511404177.
7. Bank, L.; Marlowe, J.H.; Reid, J.B.; Patterson, G.R.; Weinrott, M.R. A comparative evaluation of parent-training interventions for families of chronic delinquents. *Journal of Abnormal Child Psychology* **1991**, *19*, 15-33, doi:10.1007/BF00910562.
8. Barfield, C.K.; Hutchinson, M.A. Observations on Adolescent Anger and an Anger Control Group in Residential and Day Treatment. *Residential Treatment for Children & Youth* **1990**, *7*, 45-58.
9. Barnert, E.S.; Himelstein, S.; Herbert, S.; Garcia-Romeu, A.; Chamberlain, L.J. Innovations in Practice: Exploring an intensive meditation intervention for incarcerated youth. *Child and Adolescent Mental Health* **2014**, *19*, 69-73.
10. Belknap, R.A.; Haglund, K.; Felzer, H.; Pruszyński, J.; Schneider, J. A Theater Intervention to Prevent Teen Dating Violence for Mexican-American Middle School Students. *Journal of Adolescent Health* **2013**, *53*, 62-67.
11. Bell, C.R.; Mundy, P.; Quay, H.C. Modifying Impulsive Responding in Conduct-Disordered Institutionalized Boys. *Psychological Reports* **1983**, *52*, 307-310.

12. Bögels, S.; Hoogstad, B.; Van Dun, L.; De Schutter, S.; Restifo, K. Mindfulness Training for Adolescents with Externalizing Disorders and their Parents. *Behavioural and Cognitive Psychotherapy* **2008**, *36*, 193-209.
13. Borduin, C.M.; Mann, B.J.; Cone, L.T.; Henggeler, S.W.; Fucci, B.R.; Blaske, D.M.; Williams, R.A. Multisystemic treatment of serious juvenile offenders: long-term prevention of criminality and violence. *Journal of Consulting and Clinical Psychology* **1995**, *63*, 569-578, doi:10.1037//0022-006x.63.4.569.
14. Bosworth, K.; Espelage, D.; DuBay, T. A computer-based violence prevention intervention for young adolescents: Pilot study. *Adolescence* **1998**, *33*, 785-795.
15. Brank, E.M.; Lane, J.; Turner, S.; Fain, T.; Sehgal, A. An Experimental Juvenile Probation Program: Effects on Parent and Peer Relationships. *Crime & Delinquency* **2008**, *54*, 193-224.
16. Brigham, T.A.; Hopper, C.; Hill, B.; De Armas, A.; Newsom, P. A Self-Management Program for Disruptive Adolescents in the School: A Clinical Replication Analysis. *Behavior Therapy* **1985**, *16*, 99-115.
17. Brown, G.M.; Greenspan, S. Effect of Social Foresight Training on the School Adjustment of High-Risk Youth. *Child Study Journal* **1984**, *14*, 61-77.
18. Burt, I. Leadership-Driven Anger Management Groups for Adolescents: Do They Really Work? *The Journal for Specialists in Group Work* **2018**, *43*, 57-80.
19. Caldwell, S.; Joseph, L.M. Helping female juveniles improve their on-task behavior and academic performance using a self-management procedure in a correctional facility. *Contemporary School Psychology* **2012**, *16*, 61-74.
20. Cancio, E.J.; West, R.P.; Young, K.R. Improving Mathematics Homework Completion and Accuracy of Students with EBD Through Self-Management and Parent Participation. *Journal of Emotional and Behavioral Disorders* **2004**, *12*, 9-22.
21. Cardwell, S.M.; Mazerolle, L.; Bennett, S.; Piquero, A.R. Changing the Relationship Between Impulsivity and Antisocial Behavior: The Impact of a School Engagement Program. *Crime & Delinquency* **2019**, *65*, 1076-1101.
22. Carpenter, P.; Sandberg, S. "The things inside:" psychodrama with delinquent adolescents. *Psychotherapy: Theory, Research and Practice* **1973**, *10*, 245-247.
23. Carpenter, P.; Sandberg, S. Further Psychodrama with Delinquent Adolescents. *Adolescence* **1985**, *20*, 599-604.

24. Carr, S.C.; Punzo, R.P. The Effects of Self-Monitoring of Academic Accuracy and Productivity on the Performance of Students with Behavioral Disorders. *Behavioral Disorders* **1993**, *18*, 241-250.
25. Carroll, A.; Ashman, A.; Hemingway, F.; Bower, J.; Houghton, S. A Preliminary Evaluation of Mindfields: A Self-Regulatory Cognitive Behavioural Program for School-Aged Adolescent Offenders. *The Australian Educational and Developmental Psychologist* **2012**, *29*, 81-94.
26. Chao-Fernandez, R.; Gisbert-Caudeli, V.; Vazquez-Sanchez, R. Emotional Training and Modification of Disruptive Behaviors through Computer-Game-Based Music Therapy in Secondary Education. *Appl Sci-Basel* **2020**, *10*, doi:10.3390/app10051796.
27. Claro, A.; Boulanger, M.-M.; Shaw, S.R. Targeting Vulnerabilities to Risky Behavior: an Intervention for Promoting Adaptive Emotion Regulation in Adolescents. *Contemporary School Psychology* **2015**, *19*, 330-339.
28. Clement, P.W. A Strengths-Based, Skill-Building, Integrative Approach to Treating Conduct Problems in a 12-Year-Old Boy: Rafael's Story. *Pragmatic Case Studies in Psychotherapy* **2011**, *7*, 351-398.
29. Coleman, M.; Pfeiffer, S.; Oakland, T. Aggression Replacement Training with Behaviorally Disordered Adolescents. *Behavioral Disorders* **1992**, *18*, 54-66.
30. Connell, A.M.; Dishion, T.J.; Yasui, M.; Kavanagh, K. An Adaptive Approach to Family Intervention: Linking Engagement in Family-Centered Intervention to Reductions in Adolescent Problem Behavior. *Journal of Consulting and Clinical Psychology* **2007**, *75*, 568-579.
31. Coonerty-Femiano, A. Developing and evaluating an anger management intervention for boys: What does gender have to do with it? *Dissertation* **2008**, *69*, 5771.
32. Corder, B.F.; Whiteside, R.; Haizlip, T. Biofeedback, cognitive training and relaxation techniques as multimodal adjunct therapy for hospitalized adolescents: A pilot study. *Adolescence* **1986**, *21*, 339-346.
33. Cuenca-Sanchez, Y.; Mastropieri, M.A.; Scruggs, T.E.; Kidd, J.K. Teaching Students with Emotional and Behavioral Disorders to Self-advocate through Persuasive Writing. *Exceptionality* **2012**, *20*, 71-93.
34. Currie, M. Doing Anger Differently: A Group Percussion Therapy for Angry Adolescent Boys. *International Journal Of Group Psychotherapy* **2004**, *54*, 275-294.

35. Currie, M.; Startup, M. Doing Anger Differently: Two controlled trials of percussion group psychotherapy for adolescent reactive aggression. *Journal of Adolescence* **2012**, *35*, 843-853.
36. Dangel, R.F.; Deschner, J.P.; Rasp, R.R. Anger Control Training for Adolescents in Residential-Treatment. *Behavior Modification* **1989**, *13*, 447-458.
37. Davidson, W.S.; Redner, R.; Blakely, C.H.; Mitchell, C.M.; Emshoff, J.G. Diversion of Juvenile Offenders: An Experimental Comparison. *Journal of Consulting and Clinical Psychology* **1987**, *55*, 68-75.
38. Davis, R.W.; Hajicek, J.O. Effects of Self-Instructional Training and Strategy Training on a Mathematics Task with Severely Behaviorally Disordered Students. *Behavioral Disorders* **1985**, *10*, 211-218.
39. De Fuccio, M.; Kuhn, D.; Udell, W.; Callender, K. Developing Argument Skills in Severely Disadvantaged Adolescent Males in a Residential Correctional Setting. *Applied Developmental Science* **2009**, *13*, 30-41.
40. Deffenbacher, J.L.; Lynch, R.S.; Oetting, E.R.; Kemper, C.C. Anger Reduction in Early Adolescents. *Journal of Counseling Psychology* **1996**, *43*, 149-157.
41. Derbyshire, J.M.; Tarrant, E.; Fitter, R.; Gibson, R.A. Evaluating treatment outcomes for young people participating in a high-intensity therapeutic violence intervention in the English Youth Custody Service. *Legal and Criminological Psychology* **2019**, *24*, 162-178.
42. Dishion, T.J.; Andrews, D.W. Preventing escalation in problem behaviors with high-risk young adolescents: immediate and 1-year outcomes. *Journal of consulting and Clinical Psychology* **1995**, *63*, 538-548, doi:10.1037//0022-006x.63.4.538.
43. Dos Santos, A. Empathy and Aggression in Group Music Therapy with Teenagers: A Descriptive Phenomenological Study. *Music Therapy Perspectives* **2018**, *37*, 14-27.
44. Down, R.; Willner, P.; Watts, L.; Griffiths, J. Anger management groups for adolescents: A mixed-methods study of efficacy and treatment preferences. *Clinical Child Psychology and Psychiatry* **2011**, *16*, 33-52.
45. Ducharme, P.; Wharff, E.; Kahn, J.; Hutchinson, E.; Logan, G.; Waber, D.; Holland, J.; Gosselin, G.; Gonzalez-Heydrich, J. Augmenting Anger Control Therapy with a Videogame Requiring Emotional Control: A Pilot Study on an Inpatient Psychiatric Unit. *Adolescent Psychiatry* **2012**, *2*, 323-332.

46. Dykeman, B.F. The Social Cognitive Treatment of Anger and Aggression in Four Adolescents with Conduct Disorder. *Journal of Instructional Psychology* **1995**, *22*, 194-200.
47. Elder, J.P.; Edelstein, B.A. Adolescent Psychiatric Patients: Modifying Aggressive Behavior with Social Skills Training. *Behavior Modification* **1979**, *3*, 161-178.
48. Ennis, R.P.; Jolivette, K.; Terry, N.P.; Fredrick, L.D.; Alberto, P.A. Classwide Teacher Implementation of Self-Regulated Strategy Development for Writing with Students with E/BD in a Residential Facility. *Journal of Behavioral Education* **2015**, *24*, 88-111.
49. Etscheidt, S. Reducing aggressive behavior and improving self-control: A cognitive-behavioral training program for behaviorally disordered adolescents. *Behavioral Disorders* **1991**, *16*, 107-115.
50. Feindler, E.L. Ideal treatment package for children and adolescents with anger disorders. *Issues in Comprehensive Pediatric Nursing* **1995**, *18*, 233-260.
51. Feindler, E.L.; Ecton, R.B.; Kingsley, D.; Dubey, D.R. Group anger-control training for institutionalized psychiatric male adolescents. *Behavior Therapy* **1986**, *17*, 109-123.
52. Feindler, E.L.; Marriott, S.A.; Iwata, M. Group anger control training for junior high school delinquents. *Cognitive Therapy and Research* **1984**, *8*, 299-311.
53. Felver, J.C.; Razza, R.; Morton, M.L.; Clawson, A.J.; Mannion, R.S. School-based yoga intervention increases adolescent resilience: a pilot trial. *Journal of Child & Adolescent Mental Health* **2020**, *32*, 1-10, doi:10.2989/17280583.2019.1698429.
54. Fishbein, D.H.; Hyde, C.; Eldreth, D.; Paschall, M.J.; Hubal, R.; Das, A.; Tarter, R.; Ialongo, N.; Hubbard, S.; Yung, B. Neurocognitive skills moderate urban male adolescents' responses to preventive intervention materials. *Drug and Alcohol Dependence* **2006**, *82*, 47-60.
55. Fosco, G.M.; Frank, J.L.; Stormshak, E.A.; Dishion, T.J. Opening the "Black Box": family check-up intervention effects on self-regulation that prevents growth in problem behavior and substance use. *Journal of School Psychology* **2013**, *51*, 455-468.
56. Franco, C.; Amutio, A.; Lopez-Gonzalez, L.; Oriol, X.; Martinez-Taboada, C. Effect of a Mindfulness Training Program on the Impulsivity and Aggression Levels of Adolescents with Behavioral Problems in the Classroom. *Frontiers in Psychology* **2016**, *7*, 1385.
57. Fung, J.; Guo, S.S.; Jin, J.; Bear, L.; Lau, A. A Pilot Randomized Trial Evaluating a School-Based Mindfulness Intervention for Ethnic Minority Youth. *Mindfulness* **2016**, *7*, 819-828.

58. Fung, J.; Kim, J.J.; Jin, J.; Chen, G.; Bear, L.; Lau, A.S. A Randomized Trial Evaluating School-Based Mindfulness Intervention for Ethnic Minority Youth: Exploring Mediators and Moderators of Intervention Effects. *Journal of Abnormal Child Psychology* **2019**, *47*, 1-19.
59. Gaines, T.; Barry, L.M. The effect of a self-monitored relaxation breathing exercise on male adolescent aggressive behavior. *Adolescence* **2008**, *43*, 291-302.
60. Garaigordobil, M.; Pena-Sarrionandia, A. Effects of an emotional intelligence program in variables related to the prevention of violence. *Frontiers in Psychology* **2015**, *6*, 743.
61. Garrett, K.J.; Giddings, K. Improving impulse control: using an evidence-based practice approach. *Journal of Evidence-Based Social Work* **2014**, *11*, 73-83.
62. Garwood, J.D.; Werts, M.G.; Mason, L.H.; Harris, B.; Austin, M.B.; Ciullo, S.; Magner, K.; Koppenhaver, D.A.; Shin, M. Improving Persuasive Science Writing for Secondary Students With Emotional and Behavioral Disorders Educated in Residential Treatment Facilities. *Behavioral Disorders* **2019**, *44*, 227-240.
63. Gentry, M.; Ostapiuk, E.B. Management of violence in a youth treatment centre. *Issues in Criminological & Legal Psychology* **1988**, *12*, 58-68.
64. Glick, B.; Goldstein, A.P. Aggression Replacement Training. *Journal of Conseling and Development* **1987**, *65*, 356-362.
65. Glomb, N.; West, R.P. Teaching behaviorally disordered adolescents to use self-management skills for improving the completeness, accuracy, and neatness of creative writing homework assignments. *Behavioural Disorders* **1990**, *15*, 233-242.
66. Goldstein, N.E.S.; Giallella, C.L.; Haney-Caron, E.; Peterson, L.; Serico, J.; Kemp, K.; Romaine, C.R.; Zelechowski, A.D.; Holliday, S.B.; Kalbeitzer, R.; et al. Juvenile Justice Anger Management (JJAM) Treatment for Girls: Results of a randomized controlled trial. *Psychological Services* **2018**, *15*, 386-397.
67. Gomez, M.J.; Luciano, C.; Paez-Blarrina, M.; Ruiz, F.J.; Valdivia-Salas, S.; Gil-Luciano, B. Brief ACT protocol in at-risk adolescents with conduct disorder and impulsivity. *International Journal of Psychology and Psychological Therapy* **2014**, *14*, 307-332.
68. Gonzales, N.A.; Dumka, L.E.; Millsap, R.E.; Gottschall, A.; McClain, D.B.; Wong, J.J.; German, M.; Mauricio, A.M.; Wheeler, L.; Carpentier, F.D.; et al. Randomized trial of a broad preventive intervention for Mexican American adolescents. *Journal of consulting and clinical psychology* **2012**, *80*, 1-16, doi:10.1037/a0026063.

69. Gottfredson, G.D.; Jones, E.M.; Gore, T.W. Implementation and evaluation of a cognitive-behavioral intervention to prevent problem behavior in a disorganized school. *Prevention Science* **2002**, *3*, 43-56, doi:10.1023/a:1014671310038.
70. Gregory, K.M.; Kehle, T.J.; McLoughlin, C.S. Generalization and maintenance of treatment gains using self-management procedures with behaviorally disordered adolescents. *Psychological Reports* **1997**, *80*, 683-690.
71. Gross, A.M.; Brigham, T.A.; Hopper, C.; Bologna, N.C. Self-Management and Social Skills Training - a Study with Pre-Delinquent and Delinquent Youths. *Criminal Justice And Behavior* **1980**, *7*, 161-184.
72. Guerra, N.G.; Slaby, R.G. Cognitive Mediators of Aggression in Adolescent Offenders: 2. Intervention. *Developmental Psychology* **1990**, *26*, 269-277.
73. Hains, A.A. A preliminary attempt to teach the use of social problem-solving skills to delinquents. *Child Study Journal* **1984**, *14*, 271-285.
74. Hains, A.A. An anger-control intervention with aggressive delinquent youths. *Behavioral Residential Treatment* **1989**, *4*, 213-230.
75. Hains, A.A.; Hains, A.H. Cognitive-behavioral training of problem-solving and impulse-control with delinquent adolescents. *Journal of Offender Counseling* **1988**, *12*, 95-113.
76. Hanselman, J.L. Coping skills interventions with adolescents in anger management using animals in therapy. *Journal of Child and Adolescent Group Therapy* **2001**, *11*, 159-195.
77. Hansen, B.D.; Wills, H.P.; Kamps, D.M.; Greenwood, C.R. The Effects of Function-Based Self-Management Interventions on Student Behavior. *Journal of Emotional and Behavioral Disorders* **2013**, *22*, 149-159.
78. Harvey, C.; Jedlicka, H.; Martinez, S. A Program Evaluation: Equine-Assisted Psychotherapy Outcomes for Children and Adolescents. *Child and Adolescent Social Work Journal* **2020**.
79. Havighurst, S.S.; Kehoe, C.E.; Harley, A.E. Tuning in to teens: Improving parental responses to anger and reducing youth externalizing behavior problems. *Journal of Adolescence* **2015**, *42*, 148-158.
80. Hawkins, J.D.; Jenson, J.M.; Catalano, R.F.; Wells, E.A. Effects of a skills training intervention with juvenile delinquents. *Research on Social Work Practice* **1991**, *1*, 107-121.



81. Hay, C.; Meldrum, R.; Forrest, W.; Ciaravolo, E. Stability and change in risk seeking: Investigating the effects of an intervention program. *Youth Violence and Juvenile Justice* **2010**, *8*, 91-106.
82. Heaton, R.C.; Safer, D.J.; Allen, R.P.; Spinnato, N.C., Sr.; Prumo, F.M. A motivational environment for behaviorally deviant junior high school students. *Journal of Abnormal Child Psychology* **1976**, *4*, 263-275, doi:10.1007/BF00917763.
83. Hein, S.; Weeland, J.; Square, A.; Haeffel, G.J.; Chapman, J.; Macomber, D.; Lee, M.; Foley Geib, C.; Grigorenko, E.L. Effectiveness of a social problem solving training in youth in detention or on probation: An RCT and pre-post community implementation. *International Journal of Law and Psychiatry* **2020**, *72*, 101626, doi:10.1016/j.ijlp.2020.101626.
84. Henggeler, S.W.; Melton, G.B.; Smith, L.A. Family preservation using multisystemic therapy: an effective alternative to incarcerating serious juvenile offenders. *Journal of Consulting and Clinical Psychology* **1992**, *60*, 953-961, doi:10.1037//0022-006x.60.6.953.
85. Hentges, R.F.; Weaver Krug, C.M.; Shaw, D.S.; Wilson, M.N.; Dishion, T.J.; Lemery-Chalfant, K. The long-term indirect effect of the early Family Check-Up intervention on adolescent internalizing and externalizing symptoms via inhibitory control. *Development and psychopathology* **2020**, *32*, 1544-1554, doi:10.1017/S0954579419001482.
86. Hilyer, J.C.; Wilson, D.G.; Dillon, C.; Caro, L. Physical Fitness Training and Counseling as Treatment for Youthful Offenders. *Journal of Counseling Psychology* **1982**, *29*, 292-303.
87. Himmelstein, S.; Hastings, A.; Shapiro, S.; Heery, M. Mindfulness training for self-regulation and stress with incarcerated youth: A pilot study. *Probation Journal* **2011**, *59*, 151–165.
88. Hobbs, T.R.; Holt, M. The effects of token reinforcement on the behavior of delinquents in cottage settings. *Journal of Applied Behavior Analysis* **1976**, *9*, 189-198, doi:10.1901/jaba.1976.9-189.
89. Hogue, A.; Henderson, C.E.; Schmidt, A.T. Multidimensional Predictors of Treatment Outcome in Usual Care for Adolescent Conduct Problems and Substance Use. *Administration and Policy in Mental Health and Mental Health Services Research* **2017**, *44*, 380-394.

90. Holmqvist, R.; Hill, T.; Lang, A. Effects of Aggression Replacement Training in Young Offender Institutions. *International Journal of Offender Therapy and Comparative Criminology* **2009**, *53*, 74-92.
91. Hoogsteder, L.M.; Stams, G.-J.J.; Schippers, E.E.; Bonnes, D. Responsive Aggression Regulation Therapy (Re-ART): An evaluation study in a Dutch juvenile justice institution in terms of recidivism. *International Journal of Offender Therapy and Comparative Criminology* **2018**, *62*, 4403-4424.
92. Hornsveld, R.H.; Nijman, H.L.; Hollin, C.R.; Kraaimaat, F.W. Aggression control therapy for violent forensic psychiatric patients: Method and clinical practice. *International Journal of Offender Therapy and Comparative Criminology* **2008**, *52*, 222-233.
93. Hornsveld, R.H.J.; Kraaimaat, F.W.; Muris, P.; Zwets, A.J.; Kanters, T. Aggression Replacement Training for Violent Young Men in a Forensic Psychiatric Outpatient Clinic. *Journal of Interpersonal Violence* **2015**, *30*, 3174-3191.
94. Houck, C.D.; Hadley, W.; Barker, D.; Brown, L.K.; Hancock, E.; Almy, B. An Emotion Regulation Intervention to Reduce Risk Behaviors Among at-Risk Early Adolescents. *Prevention Science* **2016**, *17*, 71-82.
95. Hovell, M.F.; Blumberg, E.J.; Liles, S.; Powell, L.; Morrison, T.C.; Duran, G.; Sipan, C.L.; Burkham, S.; Kelley, N. Training AIDS and anger prevention social skills in at-risk adolescents. *Journal of Counseling & Development* **2001**, *79*, 347-355.
96. Huey, S.J., Jr.; Henggeler, S.W.; Brondino, M.J.; Pickrel, S.G. Mechanisms of change in multisystemic therapy: reducing delinquent behavior through therapist adherence and improved family and peer functioning. *Journal of Consulting and Clinical Psychology* **2000**, *68*, 451-467.
97. Huey, W.C.; Rank, R.C. Effects of Counselor and Peer-Led Group Assertive Training on Black Adolescent Aggression. *Journal of Counseling Psychology* **1984**, *31*, 95-98.
98. Jamali, S.; Sabokdast, S.; Nia, H.S.; Goudarzian, A.H.; Beik, S.; Allen, K.A. The effect of life skills training on mental health of Iranian middle school students: a preliminary study. *Iranian journal of psychiatry* **2016**, *11*, 269-273.
99. Jones, C.D.; Lowe, L.A.; Risler, E.A. The Effectiveness of Wilderness Adventure Therapy Programs for Young People Involved in the Juvenile Justice System. *Residential Treatment for Children & Youth* **2004**, *22*, 53-67.

100. Kaffman, M. Hypnosis as an adjunct to psychotherapy in child psychiatry. *Archives of General Psychiatry* **1968**, *18*, 725-738.
101. Kahn, M.W.; McFarland, J. A demographic and treatment evaluation study of institutionalized juvenile offenders. *Journal of Community Psychology* **1973**, *1*, 282-284.
102. Kanchibhotla, D.; Subramanian, S.; Kaushik, B. Association of yogic breathing with perceived stress and conception of strengths and difficulties in teenagers. *Clin Child Psychol Psychiatry* **2021**, 1359104521994633, doi:10.1177/1359104521994633.
103. Kappes, B.M.; Thompson, D.L. Biofeedback vs. video games: effects on impulsivity, locus of control and self-concept with incarcerated juveniles. *Journal of Clinical Psychology* **1985**, *41*, 698-706.
104. Kastner, J.W. Clinical Change in Adolescent Aggressive Behavior: A Group Therapy Approach. *Journal of Child and Adolescent Group Therapy* **1998**, *8*, 23-33.
105. Kauser, R.; Pinguart, M. Effectiveness of an indigenous parent training program on change in parenting styles and delinquent tendencies (challenging behaviors) in Pakistan: A randomized controlled trial. *Journal of Experimental Child Psychology* **2019**, *188*, doi:10.1016/j.jecp.2019.104677.
106. Kaya, F.; Buzlu, S. Effects of Aggression Replacement Training on problem solving, anger and aggressive behaviour among adolescents with criminal attempts in Turkey: A quasi-experimental study. *Archives of Psychiatric Nursing* **2016**, *30*, 729-735.
107. Keiley, M.K. Multiple-family group intervention for incarcerated adolescents and their families: a pilot project. *Journal of Marital and Family Therapy* **2007**, *33*, 106-124.
108. Kellner, M.H.; Bry, B.H. The effects of anger management groups in a day school for emotionally disturbed adolescents. *Adolescence* **1999**, *34*, 645-651.
109. Kellner, M.H.; Bry, B.H.; Colletti, L.-A. Teaching anger management skills to students with severe emotional or behavioral disorders. *Behavioral Disorders* **2002**, *27*, 400-407.
110. Kellner, M.H.; Colletti, L.A.; Bry, B.H. Increasing anger log use during school among middle school students with emotional/behavioral disorders. *Child & Family Behavior Therapy* **2003**, *25*, 7-21.
111. Kethineni, S.; Braithwaite, J. The Effects of a Cognitive- Behavioral Program for At-Risk Youth: Changes in Attitudes, Social Skills, Family, and Community and Peer Relationships. *Victims and Offenders* **2010**, *6*, 93-116.

112. Kifer, R.E.; Lewis, M.A.; Green, D.R.; Phillips, E.L. Training predelinquent youths and their parents to negotiate conflict situations. *Journal of Applied Behavior Analysis* **1974**, *7*, 357-364, doi:10.1901/jaba.1974.7-357.
113. Kimber, B.; Sandell, R.; Bremberg, S. Social and emotional training in Swedish classrooms for the promotion of mental health: results from an effectiveness study in Sweden. *Health Promotion International* **2008**, *23*, 134-143.
114. Langeveld, J.H.; Gundersen, K.K.; Svartdal, F. Social competence as a mediating factor in reduction of behavioral problems. *Scandinavian Journal of Educational Research* **2012**, *56*, 381-399.
115. Larson, J.D. Anger and Aggression Management Techniques through the Think First Curriculum. *Journal of Offender Rehabilitation* **1992**, *18*, 101-117.
116. Larson, J.D.; Calamari, J.E.; West, J.G.; Frevert, T.A. Aggression management with disruptive adolescents in the residential setting: Integration of a cognitive-behavioral component. *Residential Treatment for Children & Youth Violence and Juvenile Justice* **1998**, *15*, 1-9.
117. Lazarus, B.D. Self-Management and Achievement of Students with Behavior Disorders. *Psychology in the Schools* **1993**, *30*, 67-74.
118. Le, T.N.; Proulx, J. Feasibility of Mindfulness-Based Intervention for Incarcerated Mixed-Ethnic Native Hawaiian/Pacific Islander Youth. *Asian American Journal of Psychology* **2015**, *6*, 181-189.
119. Lee, D.Y.; Hallberg, E.T.; Hassard, H. Effects of Assertion Training on Aggressive Behavior of Adolescents. *Journal of Counseling Psychology* **1979**, *26*, 459-461.
120. Leonard, N.R.; Jha, A.P.; Casarjian, B.; Goolsarran, M.; Garcia, C.; Cleland, C.M.; Gwadz, M.V.; Massey, Z. Mindfulness training improves attentional task performance in incarcerated youth: a group randomized controlled intervention trial. *Frontiers in Psychology* **2013**, *4*, 792.
121. Leve, L.D.; Chamberlain, P.; Reid, J.B. Intervention outcomes for girls referred from juvenile justice: effects on delinquency. *Journal of Consulting and Clinical Psychology* **2005**, *73*, 1181-1185, doi:10.1037/0022-006X.73.6.1181.
122. Lök, N.; Bademli, K.; Canbaz, M. The Effects of Anger Management Education on Adolescents' Manner of Displaying Anger and Self-Esteem: A Randomized Controlled Trial. *Archives of Psychiatric Nursing* **2018**, *32*, 75-81.

123. Lombas, A.S.; Jimenez, T.I.; Arguis-Rey, R.; Hernandez-Paniello, S.; Valdivia-Salas, S.; Martin-Albo, J. Impact of the Happy Classrooms Programme on Psychological Well-being, School Aggression, and Classroom Climate. *Mindfulness* **2019**, *10*, 1642-1660.
124. Long, S.J.; Sherer, M. Social Skills Training With Juvenile Offenders. *Child & Family Behavior Therapy* **1984**, *6*, 1-11.
125. Lutz, B. An Institutional Case Study: Emotion Regulation With HeartMath at Santa Cruz County Children's Mental Health. *Global Advances in Health and Medicine* **2014**, *3*, 68-71.
126. MacMahon, J.R.; Gross, R.T. Physical and psychological effects of aerobic exercise in delinquent adolescent males. *American Journal of Diseases of Children* **1988**, *142*, 1361-1366.
127. Marco, J.H.; Garcia-Palacios, A.; Botella, C. Dialectical behavioural therapy for oppositional defiant disorder in adolescents: A case series. *Psicothema* **2013**, *25*, 158-163.
128. Marshall, A.E.; Heward, W.L. Teaching self-management to incarcerated youth. *Behavioral Disorders* **1979**, *4*, 215-226.
129. Martin, G.; Johnson, C.L. The boys totem town neurofeedback project: A pilot study of EEG biofeedback with incarcerated juvenile felons. *Journal of Neurotherapy: Investigations in Neuromodulation, Neurofeedback and Applied Neuroscience* **2005**, *9*, 71-86.
130. Martsch, M.D. A Comparison of Two Group Interventions for Adolescent Aggression: High Process Versus Low Process. *Research on Social Work Practice* **2005**, *15*, 8-18.
131. Marvit, R.C.; Lind, J.; McLaughlin, D.G. Use of videotape to induce attitude change in delinquent adolescents. *American Journal of psychiatry* **1974**, *131*, 996-999.
132. Mason, L.H.; Kubina, R.M.; Valasa, L.L.; Cramer, A.M. Evaluating Effective Writing Instruction for Adolescent Students in an Emotional and Behavior Support Setting. *Behavioral Disorders* **2010**, *35*, 140-156.
133. Mason, W.A.; January, S.A.; Fleming, C.B.; Thompson, R.W.; Parra, G.R.; Haggerty, K.P.; Snyder, J.J. Parent training to reduce problem behaviors over the transition to high school: tests of indirect effects through improved emotion regulation skills. *Children and youth services review* **2016**, *61*, 176-183, doi:10.1016/j.childyouth.2015.12.022.
134. Mathur, S.R.; Rutherford, R.B. Teaching Conversational Social Skills to Delinquent Youth. *Behavioral Disorders* **1994**, *19*, 294-305.

135. Maya, J.; Hidalgo, V.; Jimenez, L.; Lorence, B. Effectiveness of Scene-Based Psychodramatic Family Therapy (SB-PFT) in adolescents with behavioural problems. *Health Soc Care Community* **2019**, *28*, 555-567, doi:10.1111/hsc.12888.
136. Mazerolle, L.; Antrobus, E.; Bennett, S.; Eggins, E. Reducing Truancy and Fostering a Willingness to Attend School: Results from a Randomized Trial of a Police-School Partnership Program. *Prevention science* **2017**, *18*, 469-480, doi:10.1007/s11121-017-0771-7.
137. Mazerolle, L.; Bennett, S.; Antrobus, E.; Cardwell, S.M.; Eggins, E.; Piquero, A.R. Disrupting the Pathway from Truancy to Delinquency: A Randomized Field Trial Test of the Longitudinal Impact of a School Engagement Program. *Journal of Quantitative Criminology* **2019**, *35*, 663-689.
138. Mazerolle, L.; Bennett, S.; Antrobus, E.; Eggins, E. The Coproduction of Truancy Control: Results from a Randomized Trial of a Police-Schools Partnership Program. *Journal of Research in Crime and Delinquency* **2017**, *54*, 791-823.
139. Mazerolle, L.; Cardwell, S.M.; Antrobus, E.; Piquero, A.R. Policing partnerships to address youth antisocial behavior: How parental risk-taking shapes child outcomes. *Criminol Public Pol* **2020**, *19*, 883-904, doi:10.1111/1745-9133.12510.
140. McAllister, L.W.; Stachowiak, J.G.; Baer, D.M.; Conderman, L. The application of operant conditioning techniques in a secondary school classroom. *Journal of Applied Behavior Analysis* **1969**, *2*, 277-285, doi:10.1901/jaba.1969.2-277.
141. McCarthy-Tucker, S.; Gold, A.; Garcia, E., III. Effects of anger management training on aggressive behavior in adolescent boys. *Journal of Offender Rehabilitation* **1999**, *29*, 129-141.
142. McCraty, R.; Atkinson, M.; Tomasino, D.; Goelitz, J.; Mayrovitz, H.N. The impact of an emotional self-management skills course on psychosocial functioning and autonomic recovery to stress in middle school children. *Integrative Physiological and Behavioral Science* **1999**, *34*, 246-268.
143. McCullough, J.P.; Huntsinger, G.M.; Nay, W.R. Self-control treatment of aggression in a 16-year-old male. *Journal of Consulting and Clinical Psychology* **1977**, *45*, 322-331.
144. McMahan, S.D.; Washburn, J.J. Violence Prevention: An Evaluation of Program Effects with Urban African American Students. *The Journal of Primary Prevention* **2003**, *24*, 43-62.

145. McNamara, E.; Heard, C. Self-control through self-recording. *Special Education Forward Trends* **1976**, *3*, 21-23.
146. McNamara, E.; Jolly, M. The reduction of disruptive behaviour using feedback on-task behaviour: an across setting study of a class of 12- and 13-year-old pupils. *Behavioural Psychotherapy* **1990**, *18*, 103-119.
147. McWhirter, B.T.; Page, G.L. Effects of anger management and goal setting group interventions on state-trait anger and self-efficacy beliefs among high risk adolescents. *Current Psychology* **1999**, *18*, 223-237.
148. Minkos, M.L.; Chafouleas, S.M.; Bray, M.A.; LaSalle, T.P. Brief Report: A Preliminary Investigation of a Mindful Breathing Intervention to Increase Academic Engagement in an Alternative Educational Setting. *Behavioral Disorders* **2018**, *43*, 436-443.
149. Minor, K.I.; Elrod, P. The effects of a probation intervention on juvenile offenders' self-concepts, loci of control, and perceptions of juvenile justice. *Youth & Society* **1994**, *25*, 490-511.
150. Mohammadi, M.R.; Salmanian, M.; Ghobari-Bonab, B.; Bolhari, J. Spiritual psychotherapy for adolescents with conduct disorder: Designing and piloting a therapeutic package. *Iranian Journal of Psychiatry* **2017**, *12*, 255-261.
151. Moneta, I.; Rousseau, C. Emotional expression and regulation in a school-based drama workshop for immigrant adolescents with behavioral and learning difficulties. *The Arts in Psychotherapy* **2008**, *35*, 329-340.
152. Moretti, M.M.; Obsuth, I. Effectiveness of an attachment-focused manualized intervention for parents of teens at risk for aggressive behaviour: The Connect Program. *Journal of Adolescence* **2009**, *32*, 1347-1357.
153. Mutiso, V.; Tele, A.; Musyimi, C.; Gitonga, I.; Musau, A.; Ndeti, D. Effectiveness of life skills education and psychoeducation on emotional and behavioral problems among adolescents in institutional care in Kenya: a longitudinal study. *Child and Adolescent Mental Health* **2018**, *23*, 351-358, doi:10.1111/camh.12232.
154. Neel, R.S.; De Bruler, L. The effects of self-management of school attendance by problem adolescents. *Adolescence* **1979**, *14*, 175-184.
155. Nelson-Gray, R.O.; Keane, S.P.; Hurst, R.M.; Mitchell, J.T.; Warburton, J.B.; Chok, J.T.; Cobb, A.R. A modified DBT skills training program for oppositional defiant adolescents: promising preliminary findings. *Behaviour Research and Therapy* **2006**, *44*, 1811-1820, doi:10.1016/j.brat.2006.01.004.

156. Nickel, C.; Lahmann, C.; Tritt, K.; Loew, T.H.; Rother, W.K.; Nickel, M.K. Short Communication: Stressed aggressive adolescents benefit from progressive muscle relaxation: A random, prospective, controlled trial. *Stress and Health* **2005**, *21*, 169-175.
157. Niles, W.J. Effects of a Moral Development Discussion Group on Delinquent and Predelinquent Boys. *Journal of Conseling Psychology* **1986**, *33*, 45-51.
158. Ninness, H.A.; Ellis, J.; Miller, W.B.; Baker, D.; Rutherford, R. The effect of a self-management training package on the transfer of aggression control procedures in the absence of supervision. *Behavior modification* **1995**, *19*, 464-490.
159. Nugent, W.R.; Bruley, C.; Allen, P. The effects of Aggression Replacement Training on male and female antisocial behavior in a runaway shelter. *Research on Social Work Practice* **1999**, *9*, 466-482.
160. Nugent, W.R.; Champlin, D.; Wiinimaki, L. The effects of anger control training on adolescent antisocial behavior. *Research on Social Work Practrice* **1997**, *7*, 446-462.
161. Ollendick, T.H.; Hersen, M. Social skills training for juvenile delinquents. *Behaviour Research and Therapy* **1979**, *17*, 547-554, doi:10.1016/0005-7967(79)90098-6.
162. Oruche, U.M.; Robb, S.L.; Draucker, C.B.; Aalsma, M.; Pescosolido, B.; Chacko, A.; Ofner, S.; Bakoyannis, G.; Brown-Podgorski, B. Pilot Randomized Trial of a Family Management Efficacy Intervention for Caregivers of African American Adolescents with Disruptive Behaviors. *Child & Youth Care Forum* **2018**, *47*, 803-827.
163. Panosky, D.M.; Shelton, D. Evaluating an Adolescent Behavioral Program: Leadership, Education, Achievement, and Development for Adolescent Female Offenders in Corrections. *International Association of Forensic Nurses* **2015**, *11*, 144-153.
164. Pardo, E.S.; Rivas, A.F.; Barnier, P.O.; Mirabent, M.B.; Lizeaga, I.K.; Cosgaya, A.D.; Alcantara, A.C.; Gonzalez, E.V.; Aguirre, B.; Torres, M.A.G. A qualitative research of adolescents with behavioral problems about their experience in a dialectical behavior therapy skills training group. *BMC Psychiatry* **2020**, *20*, 245, doi:10.1186/s12888-020-02649-2.
165. Patrick, J.; Rich, C. Anger Management Taught to Adolescents with an Experiential Object Relations Approach. *Child and Adolescent Social Work Journal* **2004**, *21*, 85-100.
166. Patterson, G.R. Interventions for boys with conduct problems: multiple settings, treatments, and criteria. *Journal of Consulting and Clinical Psychology* **1974**, *42*, 471-481, doi:10.1037/h0036731.



167. Pazaratz, D. Intervention strategies with a behavior disordered male. *Residential Treatment for Children & Youth* **1998**, *16*, 1-12.
168. Peterson, L., D.; Young, K.; West, R.P.; Peterson, M.H. Effects of student self-management on generalization of student performance to regular classrooms. *Education and Treatment of Children* **1999**, *22*, 357-372.
169. Phillips, E.L.; Phillips, E.A.; Fixsen, D.L.; Wolf, M.M. Achievement place: modification of the behaviors of pre-delinquent boys within a token economy. *Journal of Applied Behavior Analysis* **1971**, *4*, 45-59.
170. Pop-Jordanova, N. Heart Rate Variability in the Assessment and Biofeedback Training of Common Mental Health Problems in Children. *Medical Archives* **2009**, *63*, 248-252.
171. Presley, J.A.; Hughes, C. Peers as teachers of anger management to high school students with behavioral disorders. *Behavioral Disorders* **2000**, *25*, 114-130.
172. Puskar, K.R.; Ren, D.X.; McFadden, T. Testing the 'Teaching Kids to Cope with Anger' Youth Anger Intervention Program in a Rural School-based Sample. *Issues in Mental Health Nursing* **2015**, *36*, 200-208.
173. Quinn, W.H.; Van Dyke, D.J. A multiple family group intervention for first-time juvenile offenders: comparisons with probation and dropouts on recidivism. *Journal of Community Psychology* **2004**, *32*, 177-200.
174. Ramadoss, R.; Bose, B.K. Transformative Life Skills: Pilot Studies of a Yoga Model for Reducing Perceived Stress and Improving Self-Control in Vulnerable Youth. *International Journal of Yoga Therapy* **2010**, *20*, 75-80.
175. Rapp-Paglicci, L.; Stewart, C.; Rowe, W. Can a Self-Regulation Skills and Cultural Arts Program Promote Positive Outcomes in Mental Health Symptoms and Academic Achievement for At-Risk Youth? *Journal of Social Service Research* **2011**, *37*, 309-319.
176. Redondo, S.; Martinez-Catena, A.; Andres-Pueyo, A. Therapeutic Effects of a Cognitive-Behavioural Treatment with Juvenile Offenders. *The European Journal of Psychology Applied to Legal Context* **2012**, *4*, 159-178.
177. Richman, L.C.; Harper, D.C. Parental child-rearing characteristics and delinquent adolescents' response to behavioral treatment. *American Journal of Orthopsychiatry* **1979**, *49*, 527-529.
178. Rickson, D.J.; Watkins, W.G. Music therapy to promote prosocial behaviors in aggressive adolescent boys--a pilot study. *Journal of Music Therapy* **2003**, *40*, 283-301, doi:10.1093/jmt/40.4.283.

179. Rizzo, C.J.; Houck, C.; Barker, D.; Collibee, C.; Hood, E.; Bala, K. Project STRONG: an Online, Parent-Son Intervention for the Prevention of Dating Violence among Early Adolescent Boys. *Prevention Science* **2020**, doi:10.1007/s11121-020-01168-6.
180. Robinson, T.R.; Smith, S.W.; Miller, M.D. Effect of a Cognitive-Behavioral Intervention on Responses to Anger by Middle School Students with Chronic Behavior Problems. *Behavioral Disorders* **2002**, *27*, 256-271.
181. Rodriguez, A.; Esquivel, M.J.; Rodriguez, H.; Fonseca, H. Effect of a Program of Sport-Recreational Activities on Aggression and Prosocial Values among Youth Living in Social Risk. *European Journal of Human Movement* **2016**, *37*, 143-162.
182. Rogevich, M.E.; Perin, D. Effects on science summarization of a reading comprehension intervention for adolescents with behavior and attention disorders. *Exceptional Children* **2008**, *74*, 135-154.
183. Rohde, P.; Jorgensen, J.S.; Seeley, J.R.; Mace, D.E. Pilot Evaluation of the Coping Course: A Cognitive-Behavioral Intervention to Enhance Coping Skills in Incarcerated Youth. *Journal of the American Academy of Child & Adolescent Psychiatry* **2004**, *43*, 669-676.
184. Ronen, T. Imparting Self-Control Skills to Decrease Aggressive Behavior in a 12-Year-Old Boy. *Journal of Social Work* **2004**, *4*, 269–288.
185. Ronen, T.; Rosenbaum, M. Developing learned resourcefulness in adolescents to help them reduce their aggressive behavior: Preliminary findings. *Research on Social Work Practice* **2009**, *20*, 410-426.
186. Rosenberg, S. Inoculation Effect in Prevention of Increased Verbal Aggression in Schools. *Psychological Reports* **2004**, *95*, 1219-1226.
187. Rowlands, A.; Fisher, M.; Mishra, J.; Nahum, M.; Brandrett, B.; Reinke, M.; Caldwell, M.; Kiehl, K.A.; Vinogradov, S. Cognitive Training for Very High Risk Incarcerated Adolescent Males. *Frontiers in Psychiatry* **2020**, *11*, doi:10.3389/fpsyt.2020.00225.
188. Ruttledge, R.A.; Petrides, K.V. A cognitive behavioural group approach for adolescents with disruptive behaviour in schools. *School Psychology International* **2011**, *33*, 223-239.
189. Santogrossi, D.A.; O'Leary K, D.; Romanczyk, R.G.; Kaufman, K.F. Self-evaluation by adolescents in a psychiatric hospital school token program. *Journal of Applied Behavior Analysis* **1973**, *6*, 277-287, doi:10.1901/jaba.1973.6-277.

190. Sanz de Acedo Lizarraga, M.L.; Iriarte Iriarte, M.D. Enhancement of cognitive functioning and self-regulation of learning in adolescents. *The Spanish Journal of Psychology* **2001**, *4*, 55-64.
191. Scherer, D.G.; Brondino, M.J.; Henggeler, S.W.; Melton, G.B.; H., H.J.-. Multisystemic Family Preservation Therapy: Preliminary Findings From a Study of Rural and Minority Serious Adolescent Offenders. *Journal of emotional and behavioral disorders* **1994**, *2*, 198-206.
192. Schippers, E.E.; Hoogsteder, L.M.; Stams, G. Responsive Aggression Regulation Therapy (Re-ART) Improves Executive Functioning in Adolescents and Young Adults with Severe Aggression Problems: A Pilot Study. *Journal of Forensic Sciences* **2020**, doi:10.1111/1556-4029.14539.
193. Schlichter, K.J.; Horan, J.J. Effects of Stress Inoculation on the Anger and Aggression Management Skills of Institutionalized Juvenile Delinquents. *Cognitive Therapy and Research* **1981**, *5*, 359-365.
194. Schloss, P.J.; Smith, M.; Smaldino, S.; Field, M.; Tiffin, R., & ; Ramsey, D. Social learning treatment of self-injurious and aggressive behaviors of a hearing impaired youth. *Journal of the American Deafness and Rehabilitation Association* **1983**, *17*, 16-22.
195. Schuurmans, A.A.T.; Nijhof, K.S.; Engels, R.C.M.E.; Granic, I. Using a Videogame Intervention to Reduce Anxiety and Externalizing Problems among Youths in Residential Care: an Initial Randomized Controlled Trial. *Journal of Psychopathology and Behavioral Assessment* **2018**, *40*, 344-354.
196. Seckman, A.; Paun, O.; Heipp, B.; Van Stee, M.; Keels-Lowe, V.; Beel, F.; Spoon, C.; Fogg, L.; Delaney, K.R. Evaluation of the use of a sensory room on an adolescent inpatient unit and its impact on restraint and seclusion prevention. *Journal of Child and Adolescent Psychiatric Nursing* **2016**, *30*, 90-97.
197. Seivert, N.P.; Cano, A.; Casey, R.J.; May, D.K.; Johnson, A. Animal Assisted Therapy for Incarcerated Youth: A Randomized Controlled Trial. *Applied developmental science* **2018**, *22*, 139-153.
198. Shahbazi, M.; Ghanbari, F.; Jafarinasab, A.; Vaziri, S.M.; Foji, S.; Rahimi, Z.; Hasan-Nezhad, F.; Goudarzian, M. The Effectiveness of Anger Management's Training on Difficulty of Adolescent's Emotion Regulation. *Journal of Fundamental and Applied Sciences* **2017**, *9*, 879-888.

199. Sharry, J.; Owens, C. 'The rules of engagement': A case study of a group with 'angry' adolescents. *Clinical Child Psychology and Psychiatry* **2000**, *5*, 53-62.
200. Shivrattan, J.L. Social Interactional Training and Incarcerated Juvenile Delinquents. *Canadian Journal of Criminology* **1988**, *30*, 145-164.
201. Singh, N.N.; Lancioni, G.E.; Singh Joy, S.D.; Winton, A.S.W.; Sabaawi, M.; Wahler, R.G.; J., S. Adolescents With Conduct Disorder Can Be Mindful of Their Aggressive Behavior. *Journal of Emotional and Behavioral Disorders* **2007**, *15*, 56-63.
202. Smaller, M.D. Psychoanalysis and the Forward Edge Hit the Streets: The Analytic Service to Adolescents Program (ASAP). *Psychoanalytic Inquiry* **2012**, *32*, 136-146.
203. Smith, D.J.; Young, K.R.; West, R.P.; Morgan, D.P.; Rhode, G. Reducing the Disruptive Behavior of Junior High School Students: A Classroom Self-Management Procedure. *Behavioral Disorders* **1988**, *13*, 231-239.
204. Smith, S.W.; Daunic, A.P.; Algina, J.; Pitts, D.L.; Merrill, K.L.; Cumming, M.M.; Allen, C. Self-regulation for students with emotional and behavioral disorders: Preliminary effects of the I Control curriculum. *Journal of Emotional and Behavioral Disorders* **2017**, *25*, 143-156.
205. Snyder, E.P.; Shapiro, E.S. Teaching Students with Emotional/Behavioral Disorders the Skills to Participate in the Development of Their Own IEPs. *Behavioral Disorders* **1997**, *22*, 246-259.
206. Snyder, J.J.; White, M.J. The use of cognitive self-instruction in the treatment of behaviorally disturbed adolescents. *Behavior therapy* **1979**, *10*, 227-235.
207. Snyder, K.V.; Kymissis, P.; Kessler, K. Anger management for adolescents: Efficacy of brief group therapy. *Journal of the American Academy of Child & Adolescent Psychiatry* **1999**, *38*, 1409-1416.
208. Sosa-Rubi, S.G.; Saavedra-Avendano, B.; Piras, C.; Van Buren, S.J.; Bautista-Arredondo, S. True Love: Effectiveness of a School-Based Program to Reduce Dating Violence Among Adolescents in Mexico City. *Prevention Science* **2017**, *18*, 804-817.
209. Spence, S.H.; Marzillier, J.S. Social skills training with adolescent male offenders - II. short-term, long-term and generalized effects. *Behaviour Research and Therapy* **1981**, *19*, 349-368.
210. Stormshak, E.A.; Dishion, T.J.; Light, J.; Yasui, M. Implementing family-centered interventions within the public middle school: linking service delivery to change in

- student problem behavior. *Journal of Abnormal Child Psychology* **2005**, *33*, 723-733, doi:10.1007/s10802-005-7650-6.
211. Sutton, D.; Wilson, M.; Van Kessel, K.; Vanderpyl, J. Optimizing arousal to manage aggression: a pilot study of sensory modulation. *International Journal of Mental Health Nursing* **2013**, *22*, 500-511.
212. Syzmanski, T.; Casey, R.J.; Johnson, A.; Cano, A.; Albright, D.; Seivert, N.P. Dog Training Intervention Shows Social-Cognitive Change in the Journals of Incarcerated Youth. *Frontiers in Veterinary Science* **2018**, *5*.
213. Teeter, P.A.; Rumsey, R.; Natoli, L.; Naylor, D.; Smith, R. Therapeutic interventions to increase social competence in teens with impulse control deficits. *Journal of Psychotherapy in Independent Practice* **2000**, *1*, 49-70.
214. Thoder, V.J.; Cautilli, J.D. An Independent Evaluation of Mode Deactivation Therapy for Juvenile Offenders. *The International Journal of Behavioral Consultation and Therapy* **2011**, *7*, 41-46.
215. Titilayo, H.; Aderanti, R.A. Differential effectiveness of self-management and token reinforcement in the treatment of adolescents' disorderliness. *IFE Psychologia: An International Journal* **2012**, *20*, 134-151.
216. Trajkovic, N.; Pajek, M.; Sporis, G.; Petrinovic, L.; Bogataj, S. Reducing Aggression and Improving Physical Fitness in Adolescents Through an After-School Volleyball Program. *Frontiers in psychology* **2020**, *11*, 2081, doi:10.3389/fpsyg.2020.02081.
217. Trulson, M.E. Martial Arts Training: A Novel "Cure" for Juvenile Delinquency *Human Relations* **1986**, *39*, 1131-1140.
218. Trupin, E.J.; Kerns, S.E.U.; Walker, S.C.; DeRobertis, M.T.; Stewart, D.G. Family Integrated Transitions: A Promising Program for Juvenile Offenders with Co-Occurring Disorders. *Journal of Child & Adolescent Substance Abuse* **2011**, *20*, 421-436.
219. Twemlow, S.W.; Sacco, F.C. The application of traditional martial arts practice and theory to the treatment of violent adolescents. *Adolescence* **1998**, *33*, 505-518.
220. Tyson, E.H. Hip Hop Therapy: An Exploratory Study of a Rap Music Intervention with At-Risk and Delinquent Youth. *Journal of Poetry Therapy* **2002**, *15*, 131-144.
221. Umbach, R.; Raine, A.; Leonard, N.R. Cognitive Decline as a Result of Incarceration and the Effects of a CBT/MT Intervention: A Cluster-Randomized Controlled Trial. *Criminal Justice & Behavior* **2018**, *45*, 31-55.

222. Uzunoglu, G.; Baysan Arabaci, L. The effect of psychoeducation on the anger management of adolescents diagnosed with conduct disorder. *Dusunen Adam The Journal of Psychiatry and Neurological Sciences* **2017**, *30*, 344-353.
223. Valliant, P.M.; Jensen, B.; Ravenbrook, L. Brief Cognitive-Behavioral Therapy with Male-Adolescent Offenders in Open Custody or on Probation - an Evaluation of Management of Anger. *Psychological Reports* **1995**, *76*, 1056-1058.
224. Van Bockstaele, B.; van der Molen, M.J.; van Nieuwenhuijzen, M.; Salemink, E. Modification of hostile attribution bias reduces self-reported reactive aggressive behavior in adolescents. *Journal of experimental child psychology* **2020**, *194*, 104811, doi:10.1016/j.jecp.2020.104811.
225. Van Manen, T.G.; Prins, P.J.; Emmelkamp, P.M. Reducing aggressive behavior in boys with a social cognitive group treatment: results of a randomized, controlled trial. *Journal of the American Academy of Child & Adolescent Psychiatry* **2004**, *43*, 1478-1487.
226. Van Vliet, K.J.; Foskett, A.J.; Williams, J.L.; Singhal, A.; Dolcos, F.; Vohra, S. Impact of a mindfulness-based stress reduction program from the perspective of adolescents with serious mental health concerns. *Child and Adolescent Mental Health* **2017**, *22*, 16-22.
227. Van Wijk-Herbrink, M.F.; Broers, N.J.; Roelofs, J.; Bernstein, D.P. Schema Therapy in Adolescents with Disruptive Behavior Disorders. *International Journal of Forensic Mental Health* **2017**, *16*, 261-279.
228. Wainryb, C.; Pasupathi, M.; Bourne, S.; Oldroyd, K. Stories for all ages: Narrating anger reduces distress across childhood and adolescence. *Developmental Psychology* **2018**, *54*, 1072-1085.
229. West, M.; Melvin, G.; McNamara, F.; Gordon, M. An evaluation of the use and efficacy of a sensory room within an adolescent psychiatric inpatient unit. *Australian Occupational Therapy Journal* **2017**, *64*, 253-263.
230. Whitfield, G.W. Validating school social work: An evaluation of a cognitive-behavioral approach to reduce school violence. *Research on Social Work Practice* **1999**, *9*, 399-426.
231. Williams, D.Y.; Akamatsu, T. Cognitive self-guidance training with juvenile delinquents: Applicability and generalization. *Cognitive Therapy and Research*, **1978**, *2*, 285-288.
232. Wodarski, J.S.; Filipczak, J.; McCombs, D.; Koustenis, G.; Rusilko, S. Follow-up on behavioral intervention with troublesome adolescents. *Journal of Behavior Therapy and Experimental Psychiatry* **1979**, *10*, 181-188.

233. Wolff, J.C.; Ollendick, T.H. Treatment of comorbid conduct problems and depression in youth: A pilot study. *Child & Family Behavior Therapy* **2012**, *34*, 141-155.
234. Wongtongkam, N.; Ward, P.R.; Day, A.; Winefield, A.H. A trial of mindfulness meditation to reduce anger and violence in Thai youth. *International Journal of Mental Health and Addiction* **2014**, *12*, 169-180.
235. Yektatalab, S.; Khodadadi, S.; Moattari, M.; Hosseiny, F.N.; Zare, N. A web-based anger management program for parent-female adolescents' conflicts: a cluster randomized controlled trial. *International Journal of Adolescent Medicine and Health* **2017**, *31*, doi:10.1515/ijamh-2017-0012.
236. Zapolski, T.C.B.; Smith, G.T. Pilot Study: Implementing a Brief DBT Skills Program in Schools to Reduce Health Risk Behaviors Among Early Adolescents. *The Journal of School Nursing* **2017**, *33*, 198-204.
237. Zhou, Y.Q.; Gan, D.Z.Q.; Hoo, E.C.C.; Chong, D.; Chu, C.M. Evaluating the Violence Prevention Program: group and individual changes in aggression, anger, self-control, and empathy. *The Journal of Forensic Psychiatry & Psychology* **2018**, *29*, 265-287.
238. Zivin, G.; Hassan, N.R.; DePaula, G.F.; Monti, D.A.; Harlan, C.; Hossain, K.D.; Patterson, K. An effective approach to violence prevention: traditional martial arts in middle school. *Adolescence* **2001**, *36*, 443-459.
